# Supplementary material for: Exploring the Relative Influence of Atomic Parameters on Solid Solution Strengthening
Source: Research Square preprint supplement (doi:10.21203/rs.3.rs-5003860/v1), 2024-09-18
Supplement: Supplementary file 1 [file ee02d617bf722fde80ce3bcd.docx]

**Supplementary Table 1** Thermomechanical heat treatment performed on the samples under this study

| Material | HOMOGENIZATION (°C/h) | Cold Rolling (%) | Annealing (°C/h) |
| --- | --- | --- | --- |
| Pure Ni |  | 90 | 750/1 |
| Ni50Pd50 | 950/24 | 94 | 1100/3 |
| Ni63.2V36.8* | 1075/45 | 60 | 920/0.05 |
| Cr33Co33Ni33 | 1100/2 | 66 | 1100/3 |
| Cr30Co30Ni30Pd10 | 950/24 | 60 | 1100/3 |
| Cr30Co30Ni30V10 | 1100/2 | 67 | 110/3 |

*Reduction of 30% in thickness before homogenization


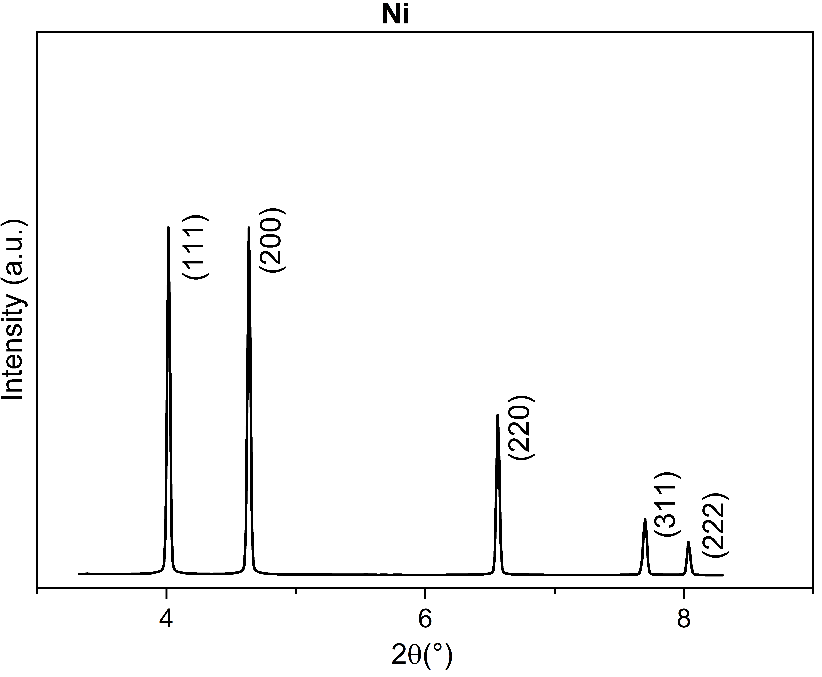


**Supplementary Figure 1**- X-ray diffraction analysis for pure Ni


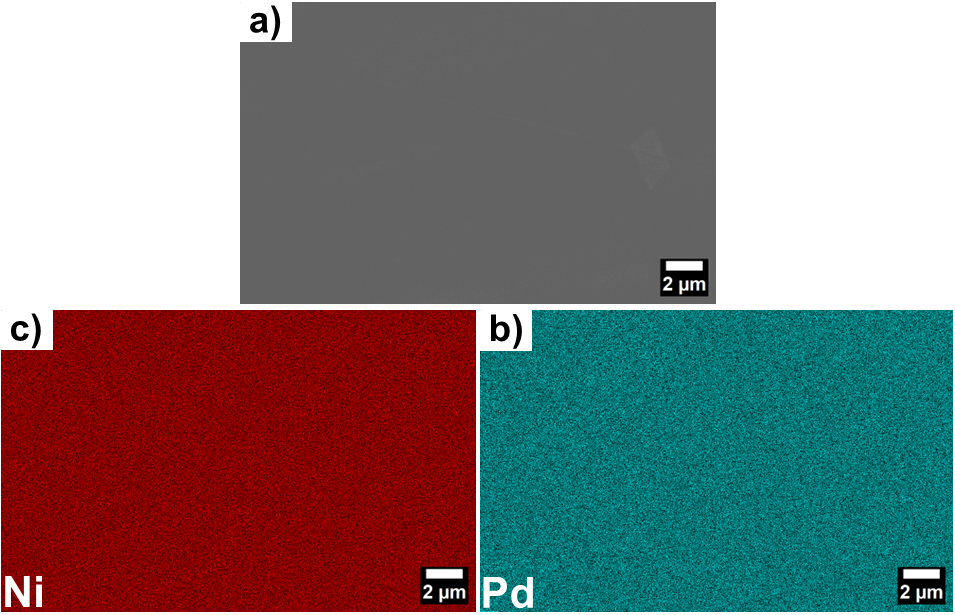


**Supplementary Figure 2** - (a) Secondary electrons (SE)-SEM image and correspondent energy dispersive spectroscopy (EDS) maps of (c) Ni and (c) Pd showing the chemical homogeneity of the Ni50Pd50 alloy.


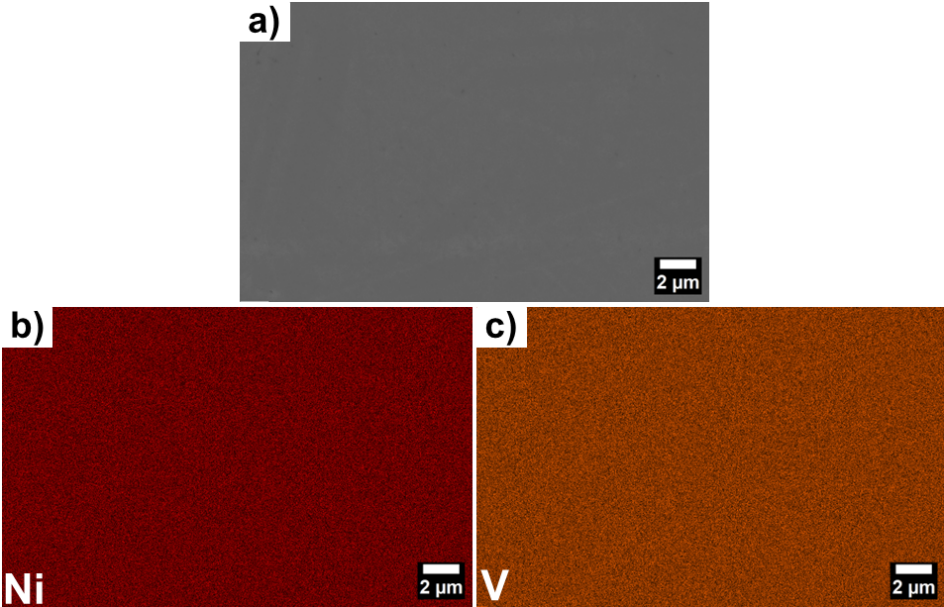


**Supplementary Figure 3** - (a) SE-SEM image and correspondent EDS maps of (b) Ni and (c) V showing chemical homogeneity of the Ni63.2V36.8 alloy.


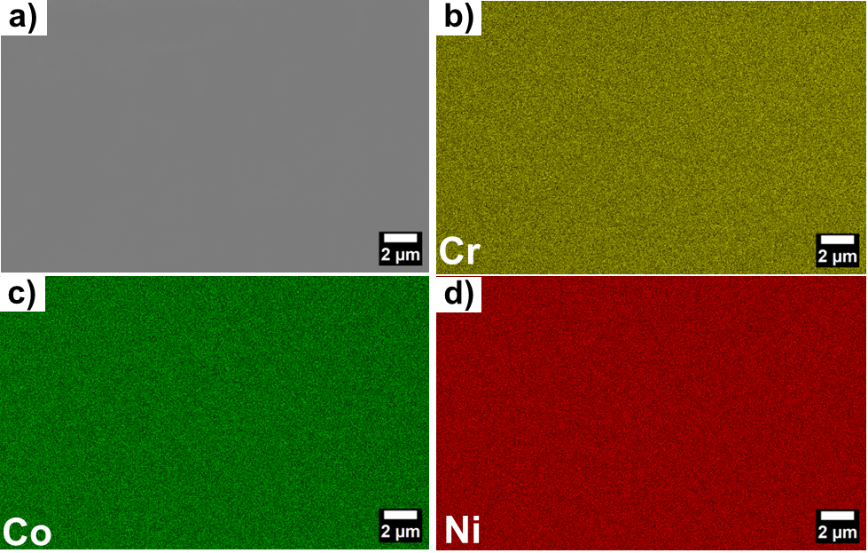


**Supplementary Figure 4** - (a) SE-SEM image and correspondent EDS maps of (b) Cr, (c) Co, and (d) Ni showing the chemical homogeneity of the Cr33.3Co33.3N33.3 alloy.


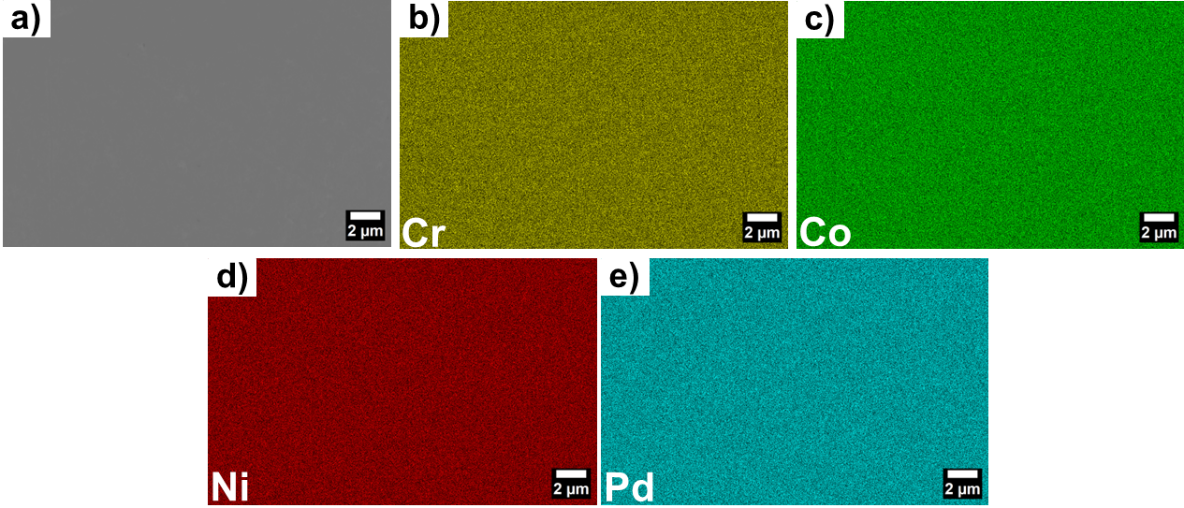


**Supplementary Figure 5** - (a) SE-SEM image and correspondent EDS maps of (b) Cr, (c) Co, (d) Ni, and (e) Pd showing the chemical homogeneity of the Cr30Co30Pd10 alloy.


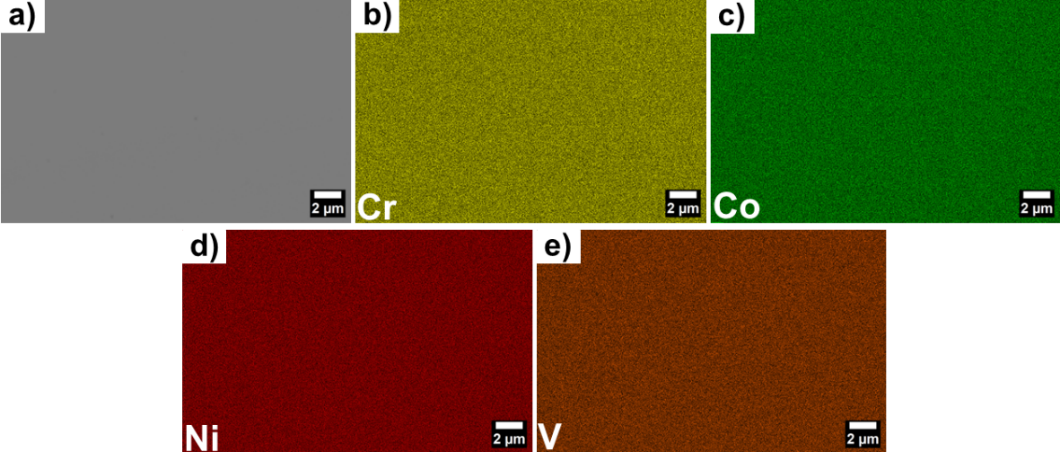


**Supplementary Figure 6** - (a) SE-SEM image and correspondent EDS maps of (b)Cr, (c) Co, (d) Ni, and (e) V showing the chemical homogeneity of the Cr30Co30Ni30V10 alloy.

**Supplementary Table 2** - Solution atomic radii, pure metal radii, Allen and Paulling electronegativity values used in this study.

| **Element** | **Solution**  **Atomic Radii (Å)** | **Allen Electronegativity** | **Pauling**  **Electronegativity** | **Allred Rochow Electronegativity** | |
| --- | --- | --- | --- | --- | --- |
| Cr | 1.284 | 1.65 | 1.65 | 1.56 |
| Co | 1.253 | 1.84 | 1.84 | 1.70 |
| Ni | 1.243 | 1.88 | 1.88 | 1.75 |
| Pd | 1.373 | 1.58 | 1.58 | 1.35 |
| V | 1.316 | 1.53 | 1.53 | 1.45 |

**Supplementary Table 3** - Electronegativity difference caused by the addition of Pd and V to pure Ni and CrCoNi system.

| Material | Δχ (Pauling) | Δχ (Allred Rochow) |
| --- | --- | --- |
| Ni50Pd50 | 0.150 | 0.200 |
| Ni63,2V36,8 | 0.135 | 0.195 |
| Cr33Co33Ni33 | 0.094 | 0.080 |
| Cr30Co30Ni30Pd10 | 0.194 | 0.158 |
| Cr30Co30Ni30V10 | 0.135 | 0.135 |


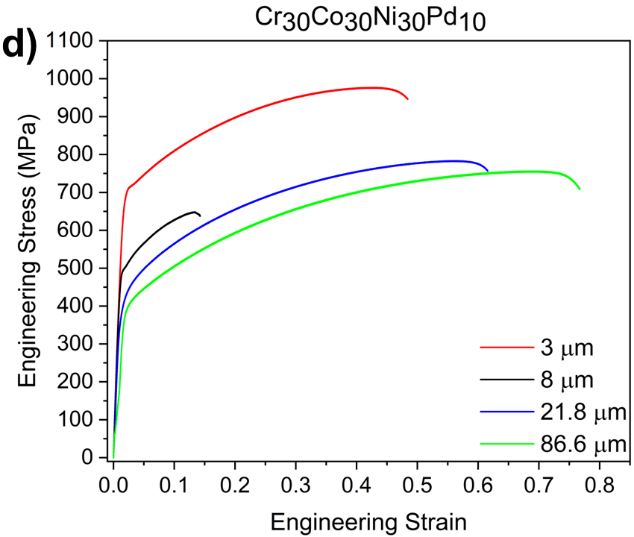

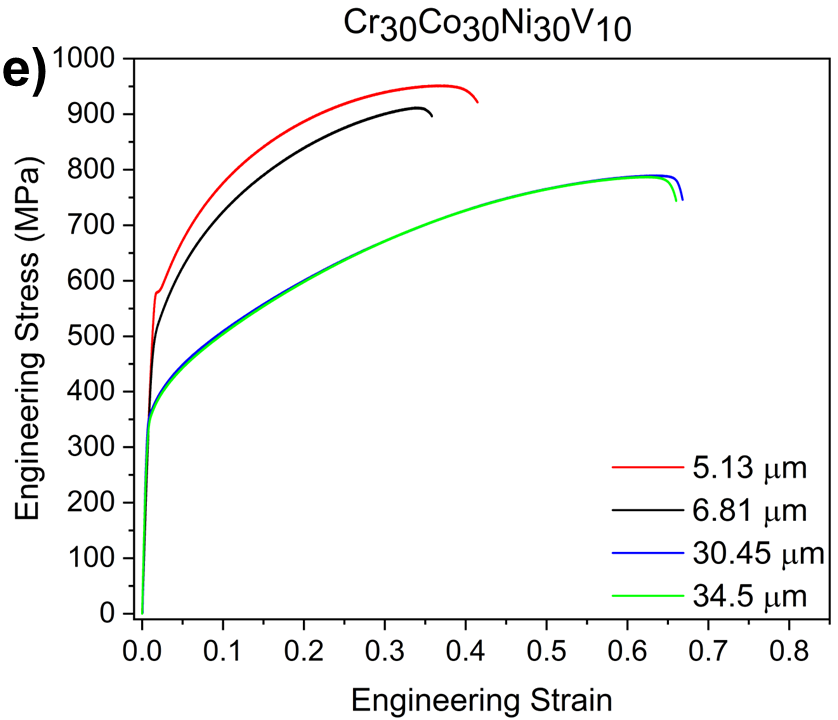

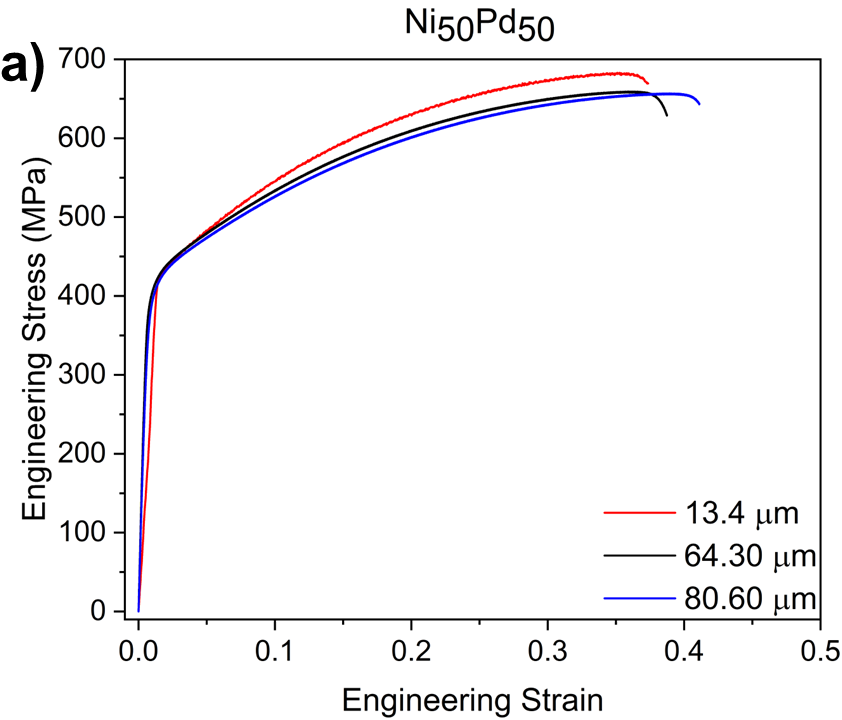

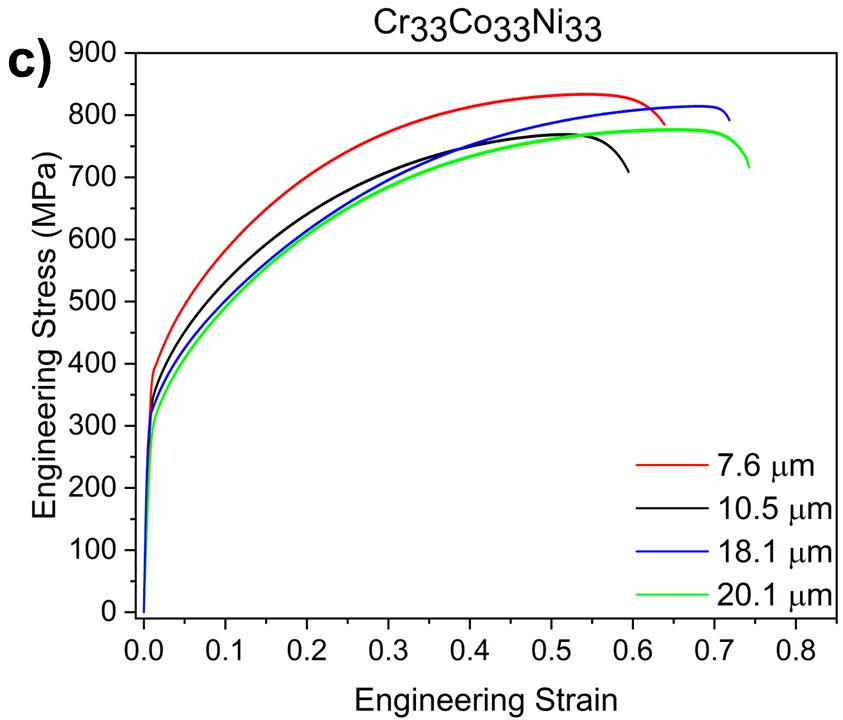

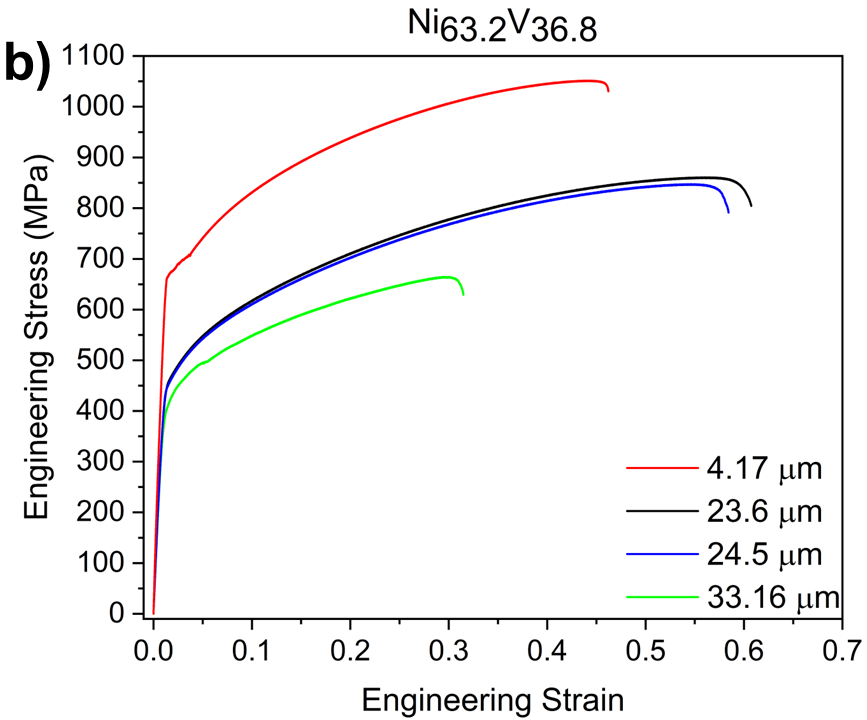


**Supplementary Figure 7** - Engineering Stress X Strain curves for the (a) Ni50Pd50, (b) Ni63.2V36.8, (c) Cr33.3Co33.3N33.3, (d) Cr30Co30Ni30Pd10 and (e) Cr30Co30Ni30V10 alloys


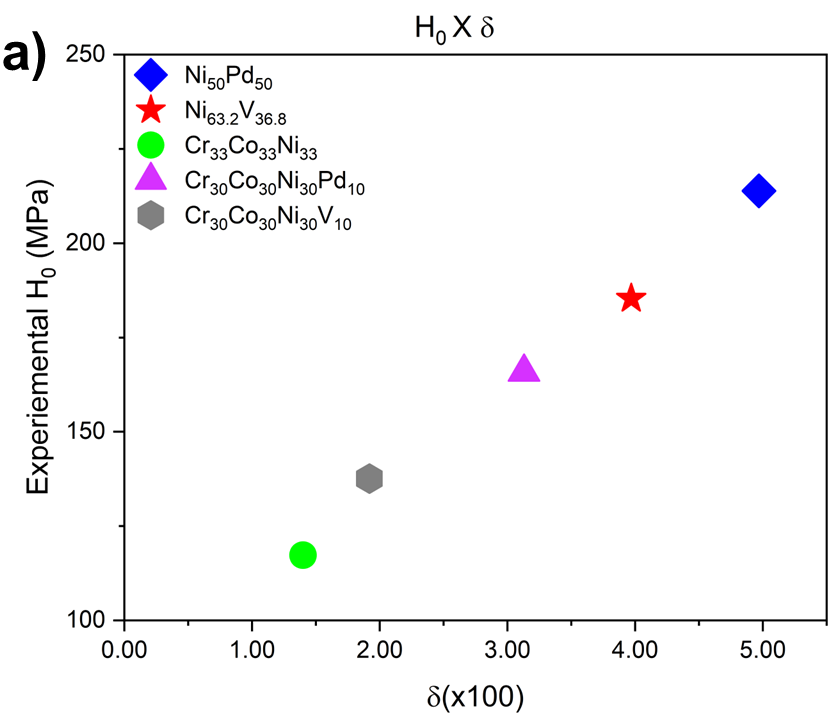

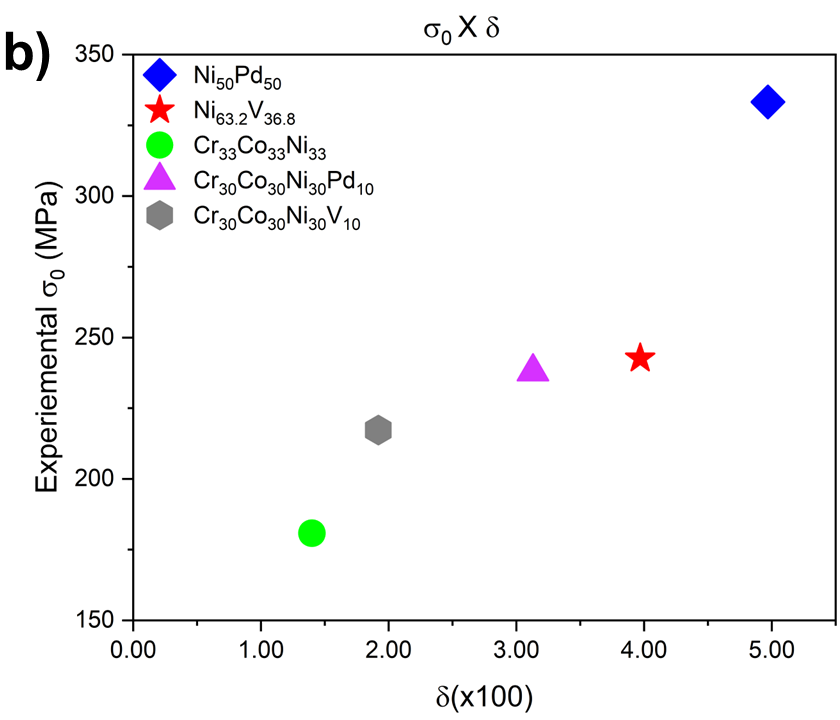


**Supplementary Figure 8** - Experimental (a) H0 and (b) σ0 for the Ni50Pd50, Ni63.2V36.8, Cr33.3Co33.3N33.3, Cr30Co30Ni30Pd10, and Cr30Co30Ni30V10 alloys

For a range of different grain sizes, the %SSS can be determined in relation to the total hardness (H) or yield stress, according to the following relationships:

%SSS (1)

%SSS (2)

**Supplementary Table 4** - Table with the critical grain size from which the SSS predominantly contributes (SSS >50%) to the hardness (H) and yield stress (σy) values

| *SSS Critical Grain Size (µm)* | | |
| --- | --- | --- |
|  | H | σy |
| *Ni50Pd50* | 1.8E-03 | 1.37 |
| *Ni63.2V36.8* | 2.34 | 13.01 |
| *Cr33Co33Ni33* | 6.62 | 8.01 |
| *Cr30Co30Ni30Pd10* | 2.28 | 7.30 |
| *Cr30Co30Ni30V10* | 6.08 | 11.28 |


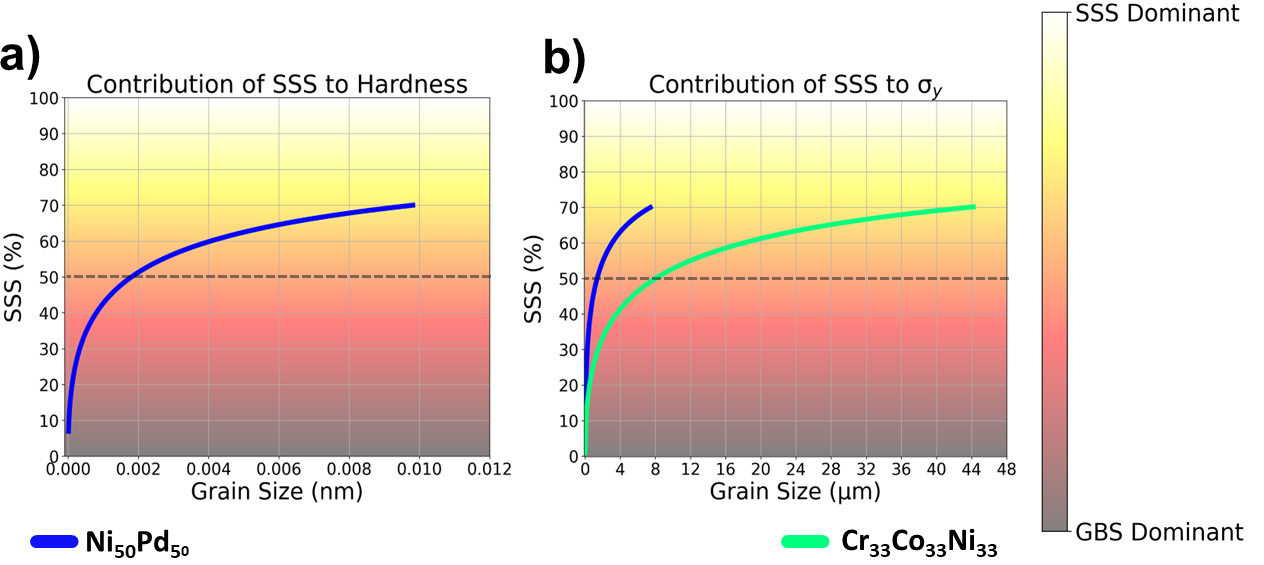


**Supplementary Figure 9** - Variation of the SSS component as a function of grain size in the (a) Hardness for the Ni50Pd50 alloy and (b) σy for the the Ni50Pd50, and Cr33Co33Ni33
